# Supplementary material
Source: Springer Nature journal article supplement (https://www.springermedizin.de/resource/supplementary/12936_2011_1933_MOESM2_ESM.pdf/9542092)

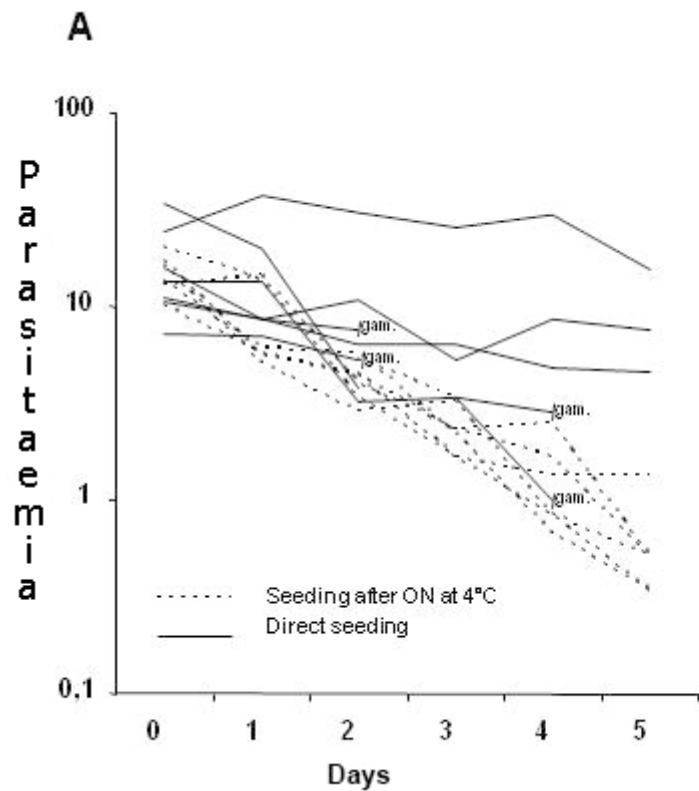

**B**

Percent of initial parasitaemia

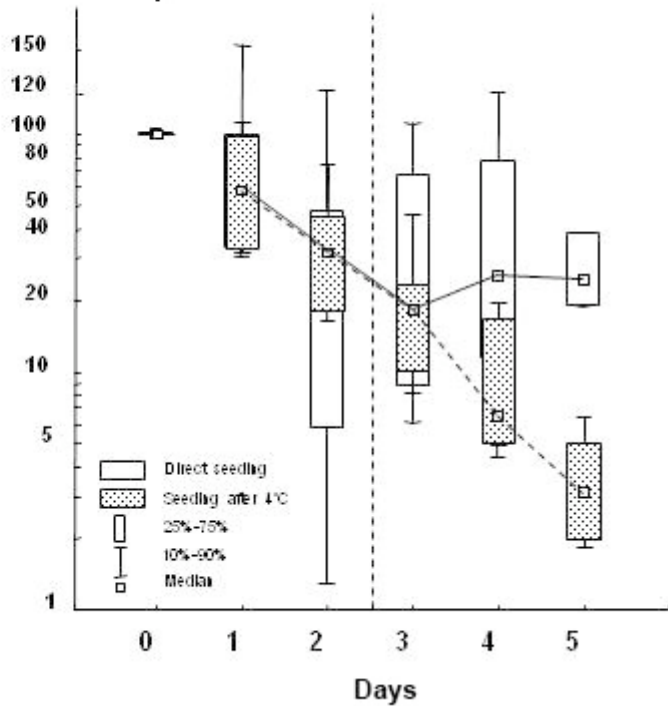

Supplement: MOESM2 [file 9542092]
